# Supplementary material for: Effect of Oral Intake of Carrot Juice on Cyclooxygenases and Cytokines in Healthy Human Blood Stimulated by Lipopolysaccharide
Source: MDPI journal article supplement (doi:10.3390/nu15030632), 2023-01-26
Supplement: s1 [file s1]

## Supplementary file S1

**Table S1: COX-1**

| Participant | Gender | No carrots<br>ng/ml | Carrots<br>ng/ml | No carrots ASA<br>ng/ml |
|-------------|--------|---------------------|------------------|-------------------------|
| 1           | M      | 6,87                | 11,25            | 4,31                    |
| 2           | F      | 10,63               | 10,36            | 4,32                    |
| 3           | F      | 8,92                | 16,08            | 5,93                    |
| 4           | F      | 11,77               | 28,00            | 13,89                   |
| 5           | F      | 5,01                | 11,08            | 3,94                    |
| 6           | F      | 6,02                | 6,78             | 6,75                    |
| 7           | M      | 11,35               | 15,41            | 2,94                    |
| 8           | M      | 8,05                | 4,20             | 6,51                    |
| 9           | F      | 29,63               | 25,11            | 3,94                    |
| 10          | F      | 6,48                | 8,70             | 8,31                    |
| 11          | F      | 2,55                | 0,78             | 1,40                    |
| 12          | F      | 7,94                | 15,29            | 8,67                    |
| 13          | M      | 7,19                | 5,07             | 3,88                    |
| 14          | M      | 10,16               | 11,96            | 6,98                    |

**Table S2: COX-2**

| Participant | Gender | No carrots<br>pg/ml | Carrots<br>pg/ml | No carrots<br>LPS added<br>pg/ml | Carrots<br>LPS added<br>pg/ml | No carrots<br>LPS and Dexa added<br>pg/ml |
|-------------|--------|---------------------|------------------|----------------------------------|-------------------------------|-------------------------------------------|
| 1           | M      | 466739              | 70542408         | 3369823                          | 86101725                      | 20508724                                  |
| 2           | F      | 1982854             | 77767535         |                                  | 90536988                      |                                           |
| 3           | F      | 1440879             | 60315102         | 1321057                          | 57246236                      | 10154718                                  |
| 4           | F      | 1096211             | 33696773         | 1895064                          | 42010169                      | 1782396                                   |
| 5           | F      | 880892              | 41306814         | 1027119                          | 49727875                      | 1097463                                   |
| 6           | F      | 1701529             | 48103345         | 1394487                          | 68351010                      | 1226752                                   |
| 7           | M      | 7347504             | 65665182         | 14423545                         | 98618868                      | 19782173                                  |
| 8           | M      | 1788805             | 82579419         | 1442408                          | 82725732                      | 25541120                                  |
| 9           | F      | 2508834             | 89849674         | 7703048                          | 84082169                      | 18143085                                  |
| 10          | F      | 1944856             | 65767433         | 2112409                          | 70168439                      | 14665148                                  |
| 11          | F      | 332885              | 55876449         | 892063                           | 98246231                      | 1,13E+08                                  |
| 12          | F      | 1514320             | 92878821         | 966018                           | 82670323                      | 10123442                                  |
| 13          | M      |                     | 1,1E+08          | 405094                           | 1,36E+08                      | 39698906                                  |
| 14          | M      | 1783695             | 1,33E+08         | 1955666                          | 93746813                      | 55485768                                  |

**Table S3: IL-1 $\alpha$** 

| Participant | Gender | No carrots<br>pg/ml | Carrots<br>pg/ml | No carrots<br>LPS<br>pg/ml | Carrots<br>LPS<br>pg/ml |
|-------------|--------|---------------------|------------------|----------------------------|-------------------------|
| 1           | M      | 1334                | 3178             | 792098                     | 451495                  |
| 2           | F      | 17197               | 1054             | 594967                     | 359751                  |
| 3           | F      | 816                 | 788              | 304987                     | 240814                  |
| 4           | F      | 1167                | 2606             | 248684                     | 268910                  |
| 5           | F      | 1090                | 1036             | 190167                     | 162474                  |
| 6           | F      | 979                 | 973              | 592583                     | 359557                  |
| 7           | M      | 5501                | 19483            | 491705                     | 499208                  |
| 8           | M      | 5773                | 4575             | 599627                     | 729206                  |
| 9           | F      | 1953                | 5089             | 471372                     | 461277                  |
| 10          | F      | 1435                | 1489             | 345003                     | 205001                  |
| 11          | F      | 1397                | 848              | 731978                     | 558499                  |
| 12          | F      | 1977                | 2063             | 720162                     | 726826                  |
| 13          | M      | 1447                | 1157             | 152859                     | 161732                  |
| 14          | M      | 1451                | 1504             | 682974                     | 556847                  |

**Table S4: IL-1 $\beta$** 

| Participant | Gender | No carrots<br>pg/ml | Carrots<br>pg/ml | No carrots<br>LPS<br>pg/ml | Carrots<br>LPS<br>pg/ml |
|-------------|--------|---------------------|------------------|----------------------------|-------------------------|
| 1           | M      | 12,20               | 327,10           | 4264,95                    | 4228,18                 |
| 2           | F      | 262,78              | 4,70             | 4238,80                    | 4259,22                 |
| 3           | F      | 4,06                | 3,34             | 4447,75                    | 4429,07                 |
| 4           | F      | 44,80               | 156,48           | 4262,55                    | 4206,87                 |
| 5           | F      | 2,65                | 2,18             | 3826,33                    | 4038,47                 |
| 6           | F      | 4,89                | 4,04             | 4203,10                    | 4316,36                 |
| 7           | M      | 268,24              | 790,10           | 4341,85                    | 4515,94                 |
| 8           | M      | 187,05              | 116,06           | 4452,19                    | 4561,16                 |
| 9           | F      | 86,35               | 198,86           | 4262,51                    | 4143,33                 |
| 10          | F      | 9,93                | 1,75             | 3718,16                    | 3903,19                 |
| 11          | F      | 27,46               | 3,99             | 4500,38                    | 4509,34                 |
| 12          | F      | 62,98               | 60,10            | 4583,52                    | 4484,52                 |
| 13          | M      | 9,19                | 14,74            | 4226,84                    | 4093,52                 |
| 14          | M      | 2,70                | 2,85             | 4305,19                    | 4065,30                 |

**Table S5: IL-6**

| Participant | Gender | No carrots<br>pg/ml | Carrots<br>pg/ml | No carrots<br>LPS<br>pg/ml | Carrots<br>LPS<br>pg/ml |
|-------------|--------|---------------------|------------------|----------------------------|-------------------------|
| 1           | M      | 17,53               | 2038,28          | 5379,97                    | 5513,18                 |
| 2           | F      | 959,10              | 3,60             | 5613,30                    | 5349,61                 |
| 3           | F      | 4,10                | 4,46             | 5354,41                    | 5246,67                 |
| 4           | F      | 177,98              | 1554,41          | 5497,29                    | 5609,63                 |
| 5           | F      | 3,24                | 3,02             | 5267,95                    | 5313,53                 |
| 6           | F      | 3,97                | 3,41             | 5384,83                    | 5360,01                 |
| 7           | M      | 1423,65             | 5105,96          | 5629,21                    | 5750,33                 |
| 8           | M      | 1801,47             | 1172,55          | 5503,03                    | 5426,75                 |
| 9           | F      | 181,46              | 2829,90          | 5401,25                    | 5621,81                 |
| 10          | F      | 6,05                | 3,39             | 5413,21                    | 5375,34                 |
| 11          | F      | 24,04               | 4,03             | 5374,92                    | 5338,72                 |
| 12          | F      | 403,69              | 530,62           | 5431,14                    | 5400,43                 |
| 13          | M      | 4,08                | 6,62             | 5402,93                    | 5325,00                 |
| 14          | M      | 2,86                | 2,84             | 5383,43                    | 5276,17                 |

**Table S6: IL-16**

| Participant | Gender | No carrots<br>pg/ml | Carrots<br>pg/ml | No carrots<br>LPS<br>pg/ml | Carrots<br>LPS<br>pg/ml |
|-------------|--------|---------------------|------------------|----------------------------|-------------------------|
| 1           | M      | 3954,10             | 1567,58          | 6547,58                    | 2315,57                 |
| 2           | F      | 1726,61             | 3034,17          | 2417,43                    | 3154,39                 |
| 3           | F      | 1736,13             | 1127,05          | 3564,32                    | 2325,84                 |
| 4           | F      | 1874,61             | 1734,83          | 3474,83                    | 2775,61                 |
| 5           | F      | 2227,17             | 2527,02          | 3097,91                    | 2200,55                 |
| 6           | F      | 2217,12             | 2213,52          | 5027,25                    | 3042,91                 |
| 7           | M      | 2008,05             | 3178,59          | 3081,54                    | 3908,23                 |
| 8           | M      | 1150,58             | 1723,19          | 2351,30                    | 2742,16                 |
| 9           | F      | 1710,07             | 1512,88          | 2183,83                    | 2417,73                 |
| 10          | F      | 2396,53             | 3727,30          | 4629,07                    | 3476,67                 |
| 11          | F      | 1445,54             | 934,02           | 3275,46                    | 1688,95                 |
| 12          | F      | 2075,51             | 2038,74          | 5235,07                    | 3698,06                 |
| 13          | M      | 3438,92             | 3493,18          | 3867,95                    | 2812,26                 |
| 14          | M      | 4785,63             | 2485,56          | 6007,96                    | 4155,71                 |

**Table S7: TNF $\alpha$** 

| Participant | Gender | No carrots<br>pg/ml | Carrots<br>pg/ml | No carrots<br>LPS<br>pg/ml | Carrots<br>LPS<br>pg/ml |
|-------------|--------|---------------------|------------------|----------------------------|-------------------------|
| 1           | M      | 9,76                | 38,51            | 7289,24                    | 9399,40                 |
| 2           | F      | 37,01               | 4,75             | 8087,47                    | 9052,15                 |
| 3           | F      | 3,95                | 3,55             | 8638,40                    | 9264,21                 |
| 4           | F      | 41,94               | 41,28            | 5468,03                    | 8485,35                 |
| 5           | F      | 4,12                | 5,03             | 3505,99                    | 3628,27                 |
| 6           | F      | 7,12                | 4,92             | 9750,26                    | 9565,62                 |
| 7           | M      | 60,02               | 63,17            | 8917,50                    | 9483,01                 |
| 8           | M      | 25,75               | 17,86            | 9053,54                    | 9408,05                 |
| 9           | F      | 18,10               | 42,27            | 7498,38                    | 7416,39                 |
| 10          | F      | 4,92                | 3,47             | 5591,09                    | 3523,72                 |
| 11          | F      | 17,69               | 4,67             | 9845,79                    | 9844,30                 |
| 12          | F      | 12,52               | 12,19            | 10061,35                   | 9782,18                 |
| 13          | M      | 5,24                | 5,30             | 9856,51                    | 9955,74                 |
| 14          | M      | 2,95                | 2,96             | 9826,49                    | 9894,36                 |
